# Supplementary material for: Vitamin D-Related Gene Polymorphisms, Plasma 25-Hydroxy-Vitamin D, Cigarette Smoke and Non-Small Cell Lung Cancer (NSCLC) Risk
Source: PubMed Central journal article supplement (PMC5085630; doi:10.3390/ijms17101597), 2016-09-22
Supplement: ijms-17-01597-s001.pdf [file ijms-17-01597-s001.pdf]

# Supplementary Materials: Vitamin D-Related Gene Polymorphisms, Plasma 25-Hydroxy-Vitamin D, Cigarette Smoke and Non-Small Cell Lung Cancer (NSCLC) Risk

Xiayu Wu, Jiaoni Cheng and Kaiyun Yang

**Table S1.** Characteristics of the single-nucleotide polymorphisms (SNPs) and primers, polymerase chain reaction (PCR) conditions used in the study.

| SNP <sup>a</sup><br>Reference | Gene                   | Chr <sup>b</sup>  | Position              | Type       | W/V <sup>c</sup> | MAF <sup>d</sup> | Primer Sequence                                                                          | PCR Conditions                                                                               |
|-------------------------------|------------------------|-------------------|-----------------------|------------|------------------|------------------|------------------------------------------------------------------------------------------|----------------------------------------------------------------------------------------------|
| rs10735810                    | VDR<br>( <i>Fok1</i> ) | 12:<br>(46559162) | No block<br>(Exon 4)  | Missense   | C/T              | 0.41             | F:5'-AGCTGGCCCTGGCACTGACTCTGCTCT-3'<br>R:5'-ATGGAAACACCTTGCTTCTTCCCTC-3'                 | 95 °C for 5 min (95 °C for 30 s, 61 °C for 30 s, 72 °C for 30 s) ×40 cycles, 72 °C for 5 min |
| rs11568820                    | VDR<br>( <i>Cdx2</i> ) | 12:<br>(46588812) | BlockC2<br>(Intron 2) | Intron     | T/C              | 0.49             | F:5'-AGTAAACTAGGTCACAATAAAAACTTATTTCCTT-3'<br>R:5'-AGTAAACTAGGTCACAGTAAAAACTTATTTCCTT-3' | 95 °C for 5 min (95 °C for 30 s, 56 °C for 30 s, 72 °C for 30 s) ×40 cycles, 72 °C for 5 min |
| rs1544410                     | VDR<br>( <i>Bsm1</i> ) | 12:<br>(46526102) | Block B<br>(Intron 2) | Intron     | G/A              | 0.11             | F:5'-CAGAGCATGGACAGGGAGCAA-3'<br>R:5'-GCAACTCCTCATGGCTGAGGTCTC-3'                        | 95 °C for 5 min (95 °C for 30 s, 60 °C for 30 s, 72 °C for 30 s) ×40 cycles, 72 °C for 5 min |
| rs7975232                     | VDR<br>( <i>Apa1</i> ) | 12:<br>(46525104) | Block B<br>(Intron 8) | Intron     | C/A              | 0.44             | F:5'-GCTCTCAGCTGGGCCCTCACTGCTCAAT-3'<br>R:5'-GCTCTCAGCTGGGCACCTCACTGCTCAAT-3'            | 95 °C for 5 min (95 °C for 30 s, 70 °C for 30 s, 72 °C for 45 s) ×40 cycles, 72 °C for 5 min |
| rs731236                      | VDR<br>( <i>Taq1</i> ) | 12:<br>(46525024) | Block B<br>(Exon 11)  | Synonymous | T/C              | 0.13             | F:5'-CAGAGCATGGACAGGGAGCAA-3'<br>R:5'-GCAACTCCTCATGGCTGAGGTCTC-3'                        | 95 °C for 5 min (95 °C for 30 s, 55 °C for 30 s, 72 °C for 45 s) ×40 cycles, 72 °C for 5 min |
| rs6068816                     | <i>CYP24A1</i>         | 20:<br>(52214498) | Block B<br>(Exon 6)   | Synonymous | C/T              | 0.48             | F:5'-ACTTCGTCAGTAACGGACGAGTGA-3'<br>R:5'-GAGTCGAGGTCATATCGTGAGTGA-3'                     | 95 °C for 5 min (95 °C for 30 s, 60 °C for 30 s, 72 °C for 45 s) ×40 cycles, 72 °C for 5 min |
| rs2244719                     | <i>CYP24A1</i>         | 20:<br>(52216265) | Block C<br>(Intron 4) | Intron     | T/C              | 0.18             | F:5'-ATAGGGTTTTTTTTCTTCCATTTCATCA-3'<br>R:5'-ATAGGGTTTTTTTTCTTCCATTTCATCA-3'             | 95 °C for 5 min (95 °C for 30 s, 65 °C for 30 s, 72 °C for 45 s) ×40 cycles, 72 °C for 5 min |
| rs4809960                     | <i>CYP24A1</i>         | 20:<br>(52219480) | Block D<br>(Intron 4) | Intron     | T/C              | 0.11             | F:5'-ACTTCGTCAGTAACGGACGGCAGG-3'<br>R:5'-GAGTCGAGGTCATATCGTGGCAGGT-3'                    | 95 °C for 5 min (95 °C for 30 s, 60 °C for 30 s, 72 °C for 45 s) ×40 cycles, 72 °C for 5 min |

Table S1. Cont.

| SNP <sup>a</sup><br>Reference | Gene    | Chr <sup>b</sup>  | Position               | Type       | W/V <sup>c</sup> | MAF <sup>d</sup> | Primer Sequence                                                                  | PCR Conditions                                                                               |
|-------------------------------|---------|-------------------|------------------------|------------|------------------|------------------|----------------------------------------------------------------------------------|----------------------------------------------------------------------------------------------|
| rs2762939                     | CYP24A1 | 20:<br>(52214658) | Block B<br>(Intron 5)  | Intron     | G/C              | 0.40             | F:5'-CTCTCTCTGCACCGGTCCTGGGAGCAATG-3'<br>R:5'-CTCTCTCTGCACCGCTCCTGGGAGCAATG-3'   | 95 °C for 5 min (95 °C for 30 s, 52 °C for 30 s, 72 °C for 30 s) ×40 cycles, 72 °C for 5 min |
| rs2181874                     | CYP24A1 | 20:<br>(52217885) | No Block<br>(Intron 4) | Intron     | G/A              | 0.15             | F:5'-GTAACCGGGAGCTGCGGGAATGTATTTCAG-3'<br>R:5'-GTAACCGGGAGCTGTGGGAATGTATTTCAG-3' | 95 °C for 5 min (95 °C for 30 s, 60 °C for 30 s, 72 °C for 45 s) ×40 cycles, 72 °C for 5 min |
| rs2296241                     | CYP24A1 | 20:<br>(52219626) | Block D<br>(Exon 4)    | Synonymous | G/A              | 0.49             | F:5'-TTGAAGGTCTTGGCCGATTTTATGGGCAG-3'<br>R:5'-TTGAAGGTCTTGGCTGATTTTATGGGCAG-3'   | 95 °C for 5 min (95 °C for 30 s, 65 °C for 30 s, 72 °C for 30 s) ×40 cycles, 72 °C for 5 min |
| rs10877012                    | CYP27B1 | 12:<br>(56448352) | No block               | downstream | G/T              | 0.41             | F:5'-CTGGCACAGAGCCTCATAG-3'<br>R:5'-CGTATGCCTGTAGTGCCTT-3'                       | 95 °C for 5 min (95 °C for 30 s, 56 °C for 30 s, 72 °C for 30 s) ×35 cycles, 72 °C for 5 min |
| rs3782130                     | CYP27B1 | 12:<br>(56448165) | Block A                | downstream | C/G              | 0.39             | F:5'-GGCCCTCTCTGTTCCTAG-3'<br>R:5'-CAACACTTTGGGAGGCTAAGG-3'                      | 95 °C for 5 min (95 °C for 30 s, 58 °C for 30 s, 72 °C for 30 s) ×35 cycles, 72 °C for 5 min |
| rs7041                        | GC      | 4:<br>(72837198)  | Block A<br>(Exon 11)   | Missense   | T/G              | 0.36             | F:5'-AAATAATGAGCAAATGAAAGAAGAC-3'<br>R:5'-CAATAACAGCAAAGAAATGAGTAGA-3'           | 95 °C for 3min (95 °C for 30 s, 64 °C for 30 s, 72 °C for 30 s) ×35 cycles, 72 °C for 7 min  |
| rs4588                        | GC      | 4:<br>(72837187)  | Block A<br>(Exon 11)   | Missense   | C/A              | 0.28             | F:5'-AAATAATGAGCAAATGAAAGAAGAC-3'<br>R:5'-CAATAACAGCAAAGAAATGAGTAG-3'            | 95 °C for 3min (95 °C for 30 s, 64 °C for 30 s, 72 °C for 30 s) ×35 cycles, 72 °C for 7 min  |

<sup>a</sup> <http://hapmap.org>; <sup>b</sup> Chr (Chromosome); <sup>c</sup> W/V (Wild/Variation); <sup>d</sup> MAF (Minor Allele Frequency) among controls.

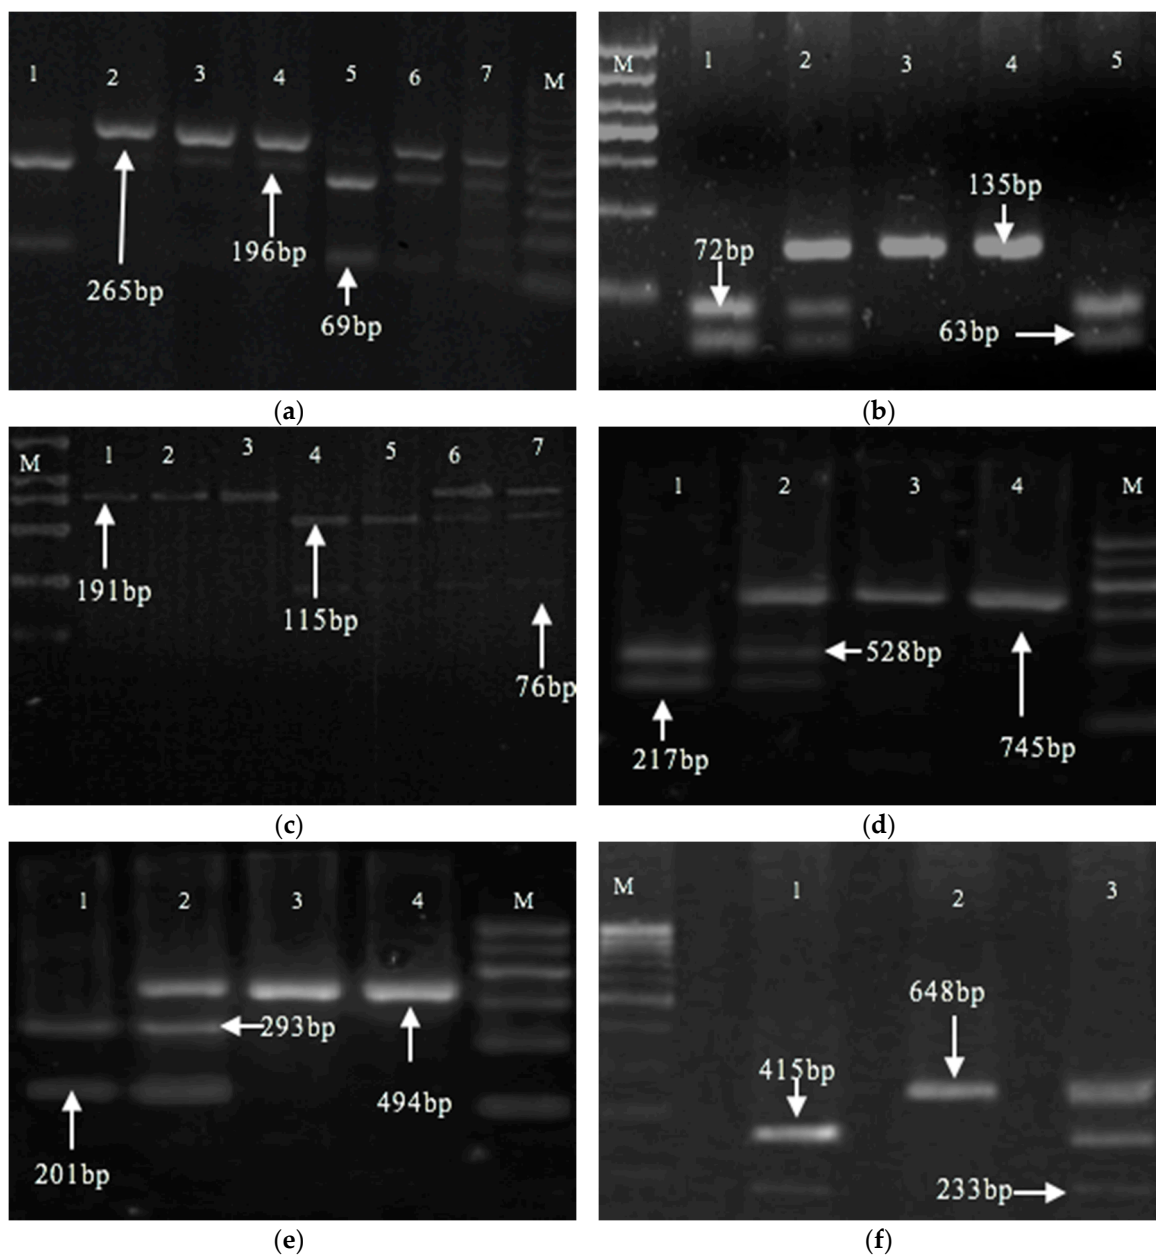

Figure S1. Cont.

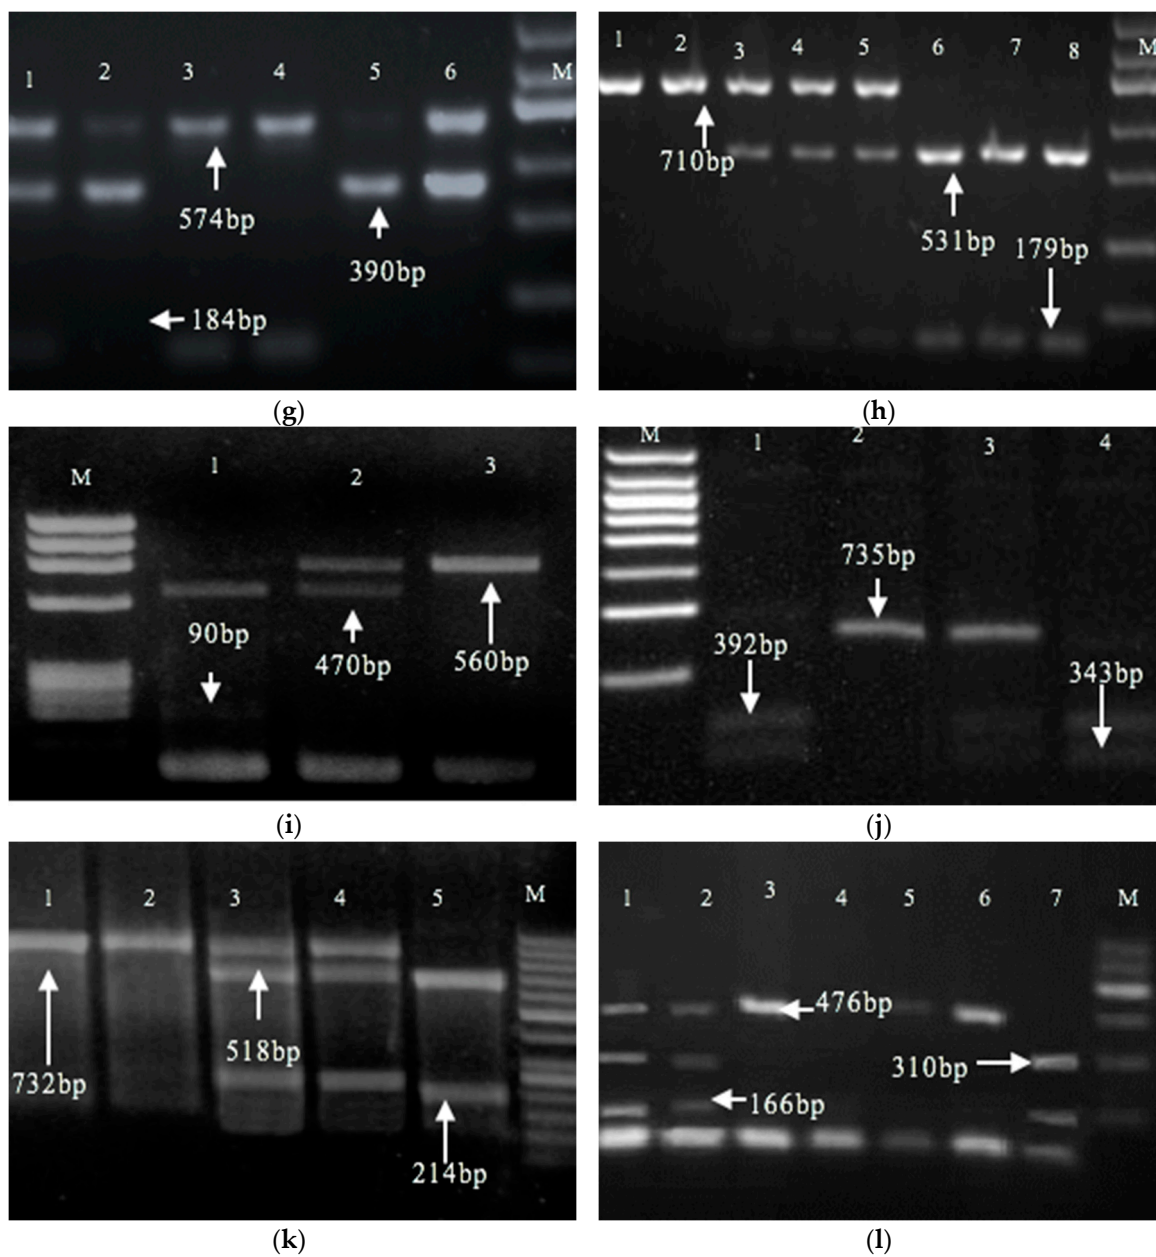

Figure S1. Cont.

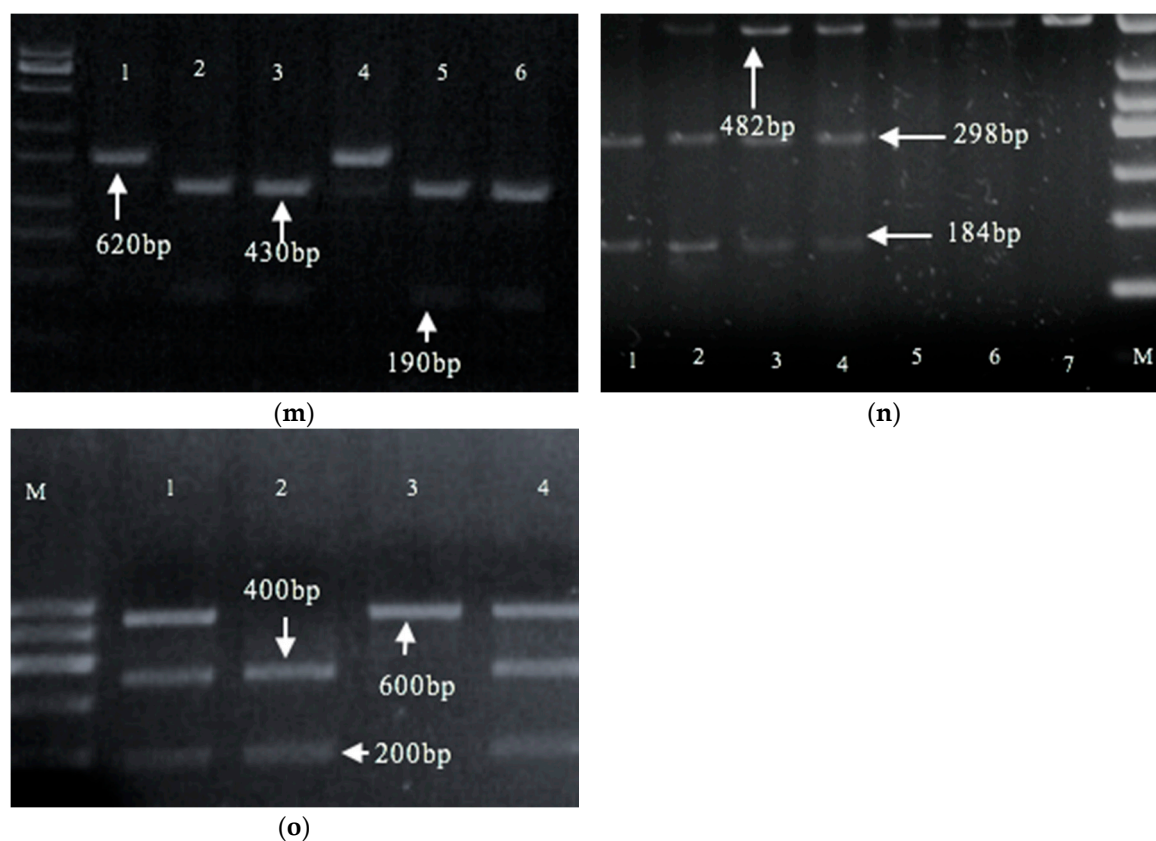

**Figure S1.** Genotyping of the Vitamin D-related gene polymorphisms Polymorphism by PCR-RFLP. (a) Genotyping of the *VDR* rs10735810 (*FokI*) Polymorphism by PCR-RFLP. Lanes 2 and 3 CC (265 bp); Lanes 1 and 5 TT (196 bp and 69 bp); Lanes 4, 6 and 7 CT (265 bp, 196 bp and 69 bp); (b) Genotyping of the *VDR* rs11568820 (*Cdx2*) Polymorphism by PCR-RFLP. Lanes 3 and 4 TT (135 bp); Lanes 1 and 5 CC (72 bp and 63 bp); Lane 2 TC (135 bp, 72 bp and 63 bp); (c) Genotyping of the *VDR* rs1544410 (*BsmI*) Polymorphism by PCR-RFLP. Lanes 1, 2 and 3 GG (191 bp); Lanes 4 and 5 AA (115 and 76 bp); Lanes 6 and 7 GA (76, 115 and 191 bp); (d) Genotyping of the *VDR* rs7975232 (*ApaI*) Polymorphism by PCR-RFLP. Lanes 3 and 4 CC (745 bp); Lane 1 AA (528 and 217 bp); Lane 2 CA (745, 528 and 217 bp); (e) Genotyping of the *VDR* rs731236 (*TaqI*) Polymorphism by PCR-RFLP. Lanes 3 and 4 TT (494bp); Lane 1 CC (201 and 293 bp); Lane 2 TC (201, 293 and 494 bp); (f) Genotyping of the *CYP24A1* rs6068816 Polymorphism by PCR-RFLP. Lane 2 CC (648 bp); Lane 1 TT (415 and 233 bp); Lane 3 CT (648, 415 and 233 bp); (g) Genotyping of the *CYP24A1* rs2244719 Polymorphism by PCR-RFLP. Lanes 3 and 4 TT (574 bp); Lane 5 CC (390 and 184 bp); Lanes 1, 2 and 6 TC (574, 390 and 184 bp); (h) Genotyping of the *CYP24A1* rs4809960 Polymorphism by PCR-RFLP. Lanes 1 and 2 TT (710 bp); Lanes 6, 7 and 8 CC (531 and 179 bp); Lanes 9, 3, 4 and 5 TC (710, 531 and 179 bp); (i) Genotyping of the *CYP24A1* rs2762939 Polymorphism by PCR-RFLP. Lane 3 GG (560 bp); Lane 1 CC (470 and 90 bp); Lane 2 GC (560, 470 and 90 bp); (j) Genotyping of the *CYP24A1* rs2181874 Polymorphism by PCR-RFLP. Lane 2 GG (735 bp); Lanes 1 and 4 AA (392 and 343 bp); Lane 3 GA (735, 392 and 343 bp); (k) Genotyping of the *CYP24A1* rs2296241 Polymorphism by PCR-RFLP. Lanes 1 and 2 GG (732 bp); Lane 5 AA (518 and 214 bp); Lanes 3 and 4 GA (574, 390 and 184 bp); (l) Genotyping of the *CYP27B1* rs10877012 Polymorphism by PCR-RFLP. Lanes 3, 4, 5, 6 GG (476 bp); Lanes 7 TT (310 and 166 bp); Lanes 1, 2 GT (476, 310 and 166 bp); (m) Genotyping of the *CYP27B1* rs3782130 Polymorphism by PCR-RFLP. Lane 1 CC (620 bp); Lanes 2, 3, 5 and 6 GG (430 and 190 bp); Lane 4 CG (620, 430 and 190 bp); (n) Genotyping of the *GC* rs7041 Polymorphism by PCR-RFLP. Lanes 5, 6 and 7 TT (482 bp); Lanes 1 and 2 GG (298 and 184 bp); Lanes 3 and 4 TG (482, 298 and 184 bp); (o) Genotyping of the *GC* rs4588 Polymorphism by PCR-RFLP. Lane 3 CC (600 bp), Lane 2 AA (400 and 200 bp), Lanes 1 and 4 CA (600, 400 and 200 bp).
